# Supplementary material for: Safety, Activity, and Biomarkers of SHR-1210, an Anti-PD-1 Antibody, for Patients with Advanced Esophageal Carcinoma
Source: Oxford University Press journal article supplement (doi:10.1158/1078-0432.ccr-17-2439), 2018-01-22
Supplement: 10780432ccr172439-sup-188090_3_supp_4460381_p17pcf.xlsx [file 10780432ccr172439-sup-188090_3_supp_4460381_p17pcf.xlsx]

## Sheet: Table S1
Supplementary Table 1. Sequence analysis summary of 23 whole exome sequenced esophageal carcinomas.
Samples	Sample Type	Clinical Benefit from PD-1 Blockade	Total Reads	Total Duplicate Reads	Duplicate Rate of Target Region	InsertSize Estimation	Reads mapped to genome	Sequenced bases mapped to genome (bp)	Fraction mapped to genome	Sequenced bases mapped to Target Regions (bp)	Fraction of Sequenced Bases Mapped to Target Regions	Sequenced bases mapped to Target Regions (bp) (after duplicates removed)	Fraction of sequenced bases mapped to Target Regions (bp) (after duplicates removed)	Fraction of bases in target regions with at least 1 unique reads	Bases in target regions with at least 5 unique reads (bp)	Fraction of bases in target regions with at least 5 unique reads	Bases in target regions with at least unique 10 reads (bp)	Fraction of bases in target regions with at least 10 unique reads
EP01	Normal	Benefit	123482501	21060298(17.06%)	0.171	199	123350619	17619634120	0.9989	9247525563	0.5248	7666211586	0.4351	0.9946	50310208	0.9939	50228773	0.9923
EP01	Tumor	Benefit	341402975	131293320(38.46%)	0.545	132	335522286	41163199062	0.9828	19221124048	0.4669	8745609845	0.2125	0.9947	50338461	0.9944	50306127	0.9938
EP02	Normal	Benefit	108970352	16084273(14.76%)	0.1481	223	108775000	15398021874	0.9982	7701541329	0.5002	6560990427	0.4261	0.9945	50296963	0.9936	50188055	0.9914
EP02	Tumor	Benefit	158227756	40551228(25.63%)	0.3301	133	157896808	19363435264	0.9979	8434681374	0.4356	5650436527	0.2918	0.9946	50300135	0.9937	50144359	0.9906
EP03	Normal	No Benefit	127227413	20401376(16.04%)	0.161	222	127055163	18063581129	0.9986	9051419252	0.5011	7593889715	0.4204	0.9947	50318478	0.994	50238134	0.9924
EP03	Tumor	No Benefit	319567254	84672216(26.50%)	0.2893	149	319328943	43748639142	0.9993	21327744320	0.4875	15158241238	0.3465	0.9947	50340054	0.9944	50315121	0.994
EP04	Normal	Benefit	122516623	12648518(10.32%)	0.1049	216	122342795	17230734367	0.9986	8661065853	0.5027	7752127379	0.4499	0.9947	50321842	0.9941	50248892	0.9926
EP04	Tumor	Benefit	342323226	65755335(19.21%)	0.2144	138	340846548	43941699895	0.9957	27635030038	0.6289	21709802411	0.4941	0.9947	50349247	0.9946	50341227	0.9945
EP05	Normal	No Benefit	119373758	14002278(11.73%)	0.1187	208	119210386	16842776308	0.9986	8552254808	0.5078	7537187318	0.4475	0.9946	50312621	0.9939	50225570	0.9922
EP05	Tumor	No Benefit	215094422	57845057(26.89%)	0.3312	138	209934126	26124541106	0.976	12356621264	0.473	8264261455	0.3163	0.9947	50315268	0.994	50216220	0.992
EP06	Normal	No Benefit	125150355	23626529(18.88%)	0.1887	207	125013652	17898785100	0.9989	9241847016	0.5163	7497496587	0.4189	0.9946	50308570	0.9938	50219988	0.9921
EP06	Tumor	No Benefit	292308520	55042913(18.83%)	0.2028	141	292064243	38952754503	0.9992	25140545196	0.6454	20042909325	0.5145	0.9947	50345567	0.9946	50336692	0.9944
EP07	Normal	No Benefit	111389576	20824323(18.70%)	0.187	192	111262277	15879106216	0.9989	8606166549	0.542	6996612788	0.4406	0.9946	50302928	0.9937	50210548	0.9919
EP07	Tumor	No Benefit	236185745	39775446(16.84%)	0.1926	137	235939218	29265455328	0.999	17316371248	0.5917	13980572899	0.4777	0.9947	50339089	0.9944	50318104	0.994
EP08	Normal	No Benefit	84153471	8122586(9.65%)	0.0979	218	84006788	11805012395	0.9983	5799256501	0.4913	5231288564	0.4431	0.9946	50278253	0.9932	50100965	0.9897
EP08	Tumor	No Benefit	150087289	24931345(16.61%)	0.1852	139	149964740	19010798139	0.9992	10922462979	0.5745	8899572364	0.4681	0.9947	50333051	0.9943	50280525	0.9933
EP09	Normal	No Benefit	112715900	20422001(18.12%)	0.1813	219	112561970	16057646588	0.9986	8285929896	0.516	6783817984	0.4225	0.9946	50304463	0.9937	50197665	0.9916
EP09	Tumor	No Benefit	299506818	62099487(20.73%)	0.215	147	299161123	40832798987	0.9988	27030554208	0.662	21218986315	0.5197	0.9947	50346024	0.9946	50335484	0.9944
EP11	Normal	Benefit	128100548	22113261(17.26%)	0.1727	216	127948504	18249045283	0.9988	9294691548	0.5093	7689927429	0.4214	0.9947	50316563	0.994	50237395	0.9924
EP11	Tumor	Benefit	240062699	34331299(14.30%)	0.1972	123	239722174	25370219637	0.9986	11859190063	0.4674	9520687439	0.3753	0.9947	50335750	0.9944	50287942	0.9934
EP12	Normal	Benefit	111958487	18533039(16.55%)	0.166	212	111817337	15969285074	0.9987	8053531371	0.5043	6716868398	0.4206	0.9946	50303283	0.9937	50195798	0.9916
EP12	Tumor	Benefit	321271721	57310404(17.84%)	0.1903	142	321069814	43016162583	0.9994	27050981739	0.6289	21904352330	0.5092	0.9947	50347002	0.9946	50339393	0.9944
EP13	Normal	No Benefit	122967184	26107054(21.23%)	0.2127	229	122812966	17403795363	0.9987	8356413786	0.4801	6578675485	0.378	0.9946	50298793	0.9936	50184454	0.9914
EP13	Tumor	No Benefit	292696570	59654244(20.38%)	0.2465	137	289687790	35709402682	0.9897	17857026805	0.5001	13455956205	0.3768	0.9947	50344267	0.9945	50328282	0.9942
EP14	Normal	No Benefit	107657284	21962064(20.40%)	0.2032	207	107532140	15228597226	0.9988	7709965512	0.5063	6143319251	0.4034	0.9946	50285838	0.9934	50128899	0.9903
EP14	Tumor	No Benefit	191123917	32269123(16.88%)	0.1882	136	190996247	24222682615	0.9993	14296465269	0.5902	11606096037	0.4791	0.9947	50342174	0.9945	50317827	0.994
EP55	Normal	Benefit	128635452	24857247(19.32%)	0.1926	199	128495812	17947546918	0.9989	8085499336	0.4505	6528036581	0.3637	0.9947	50310883	0.9939	50202875	0.9917
EP55	Tumor	Benefit	253131868	36825253(14.55%)	0.1465	172	252953818	35754486436	0.9993	20271793341	0.567	17301126197	0.4839	0.9947	50339479	0.9944	50313025	0.9939
EP56	Normal	No Benefit	102240332	18499639(18.09%)	0.1802	208	102131236	14293515624	0.9989	7142436782	0.4997	5855540453	0.4097	0.9946	50292388	0.9935	50156353	0.9908
EP56	Tumor	No Benefit	244178056	44831850(18.36%)	0.1885	180	244006710	34631979343	0.9993	18611629761	0.5374	15103461212	0.4361	0.9947	50345318	0.9946	50328476	0.9942
EP16	Normal	No Benefit	79091021	14198423(17.95%)	0.1804	186	79062283	11173972852	0.9996	6738496309	0.6031	5523111372	0.4943	0.9939	50206253	0.9918	50028526	0.9883
EP16	Tumor	No Benefit	201525045	37850499(18.78%)	0.1974	128	201435114	24999294412	0.9996	17070259705	0.6828	13701249873	0.5481	0.9938	50283782	0.9933	50254171	0.9928
EP23	Normal	Benefit	75214429	13266400(17.64%)	0.1776	192	75186392	10630881274	0.9996	6283536034	0.5911	5167639220	0.4861	0.9945	50245053	0.9926	50031821	0.9884
EP23	Tumor	Benefit	152037410	20066789(13.20%)	0.171	105	151878528	14832357718	0.999	7162114973	0.4829	5937469246	0.4003	0.9945	50241036	0.9925	49897781	0.9857
EP25	Normal	No Benefit	71456174	12469734(17.45%)	0.1761	198	71428441	10142858358	0.9996	5946584795	0.5863	4899131493	0.483	0.9944	50231260	0.9923	49986401	0.9875
EP25	Tumor	No Benefit	174259858	33677638(19.33%)	0.2273	114	174125608	18972446919	0.9992	10649997849	0.5613	8229280428	0.4337	0.9946	50310977	0.9939	50205891	0.9918
EP29	Normal	Benefit	72903472	12872309(17.66%)	0.1791	222	72869509	10324538198	0.9995	5903710700	0.5718	4846154306	0.4694	0.9944	50226556	0.9922	49978708	0.9873
EP29	Tumor	Benefit	203104198	39449352(19.42%)	0.2237	114	202982751	22382213806	0.9994	13749991174	0.6143	10673828471	0.4769	0.9947	50328994	0.9942	50280930	0.9933
EP35	Normal	No Benefit	74617878	12568296(16.84%)	0.1708	209	74584970	10582611134	0.9996	6005982615	0.5675	4980343291	0.4706	0.9944	50233508	0.9923	49999277	0.9877
EP35	Tumor	No Benefit	183406969	42295611(23.06%)	0.2627	118	183265028	20883079337	0.9992	12502989004	0.5987	9218854918	0.4415	0.9946	50302903	0.9937	50186036	0.9914
EP36	Normal	Benefit	92045677	17148112(18.63%)	0.1877	181	92009090	12932026200	0.9996	7493011938	0.5794	6086432084	0.4706	0.9945	50276281	0.9932	50120831	0.9901
EP36	Tumor	Benefit	203748456	39016275(19.15%)	0.2398	113	203532280	21066093944	0.9989	10699539480	0.5079	8133479855	0.3861	0.9946	50312451	0.9939	50197190	0.9916
EP54	Normal	Benefit	91826473	17758653(19.34%)	0.195	191	91791863	12966359024	0.9996	7833595853	0.6041	6306281860	0.4864	0.9945	50267774	0.993	50106667	0.9898
EP54	Tumor	Benefit	180568770	40196413(22.26%)	0.2478	136	180463632	21961758550	0.9994	13917732074	0.6337	10469308803	0.4767	0.9946	50322240	0.9941	50258280	0.9928
EP59	Normal	No Benefit	72674087	14040657(19.32%)	0.1915	200	72630764	10308031756	0.9994	6246481276	0.606	5050177885	0.4899	0.9936	49955930	0.9869	49248797	0.9729
EP59	Tumor	No Benefit	237918296	62153246(26.12%)	0.2608	192	237793076	33956989998	0.9995	20623124126	0.6073	15244341209	0.4489	0.9945	50300372	0.9937	50212852	0.9919
